# Supplementary material for: Influence of Different Salts on the G-Quadruplex Structure Formed from the Reversed Human Telomeric DNA Sequence
Source: MDPI journal article supplement (doi:10.3390/ijms232012206), 2022-10-13
Supplement: s1 [file s1]

# Influence of different salts on the G-quadruplex structure formed from the reversed human telomeric DNA sequence

Lydia Olejko,<sup>†</sup> Anushree Dutta,<sup>†</sup> Kosar Shahsavari,<sup>‡</sup> Ilko Bald\*

*Institute of Chemistry – Hybrid Nanostructures, University of Potsdam, Karl-Liebknecht-Str. 24-25,  
14476 Potsdam, Germany*

<sup>‡</sup> These authors contributed equally.

<sup>‡</sup> permanent address: Department of Life Science Engineering, Faculty of New Sciences & Technologies, University of Tehran, Tehran, Iran

\*corresponding author: ilko.bald@uni-potsdam.de

## CD spectroscopy for HumTel

The human telomeric DNA ((TTA GGG)<sub>n</sub>) is known for its structural polymorphism. Here, we have analyzed TT (GGG TTA)<sub>3</sub> GGG TTT with CD spectroscopy. As shown in Figure S1 the CD spectrum of the folded G-quadruplex changes in presence of different salts (KCl, NaCl, MgCl<sub>2</sub>, CaCl<sub>2</sub>). Hence, the specific G-quadruplex structures is influenced by the different cations.

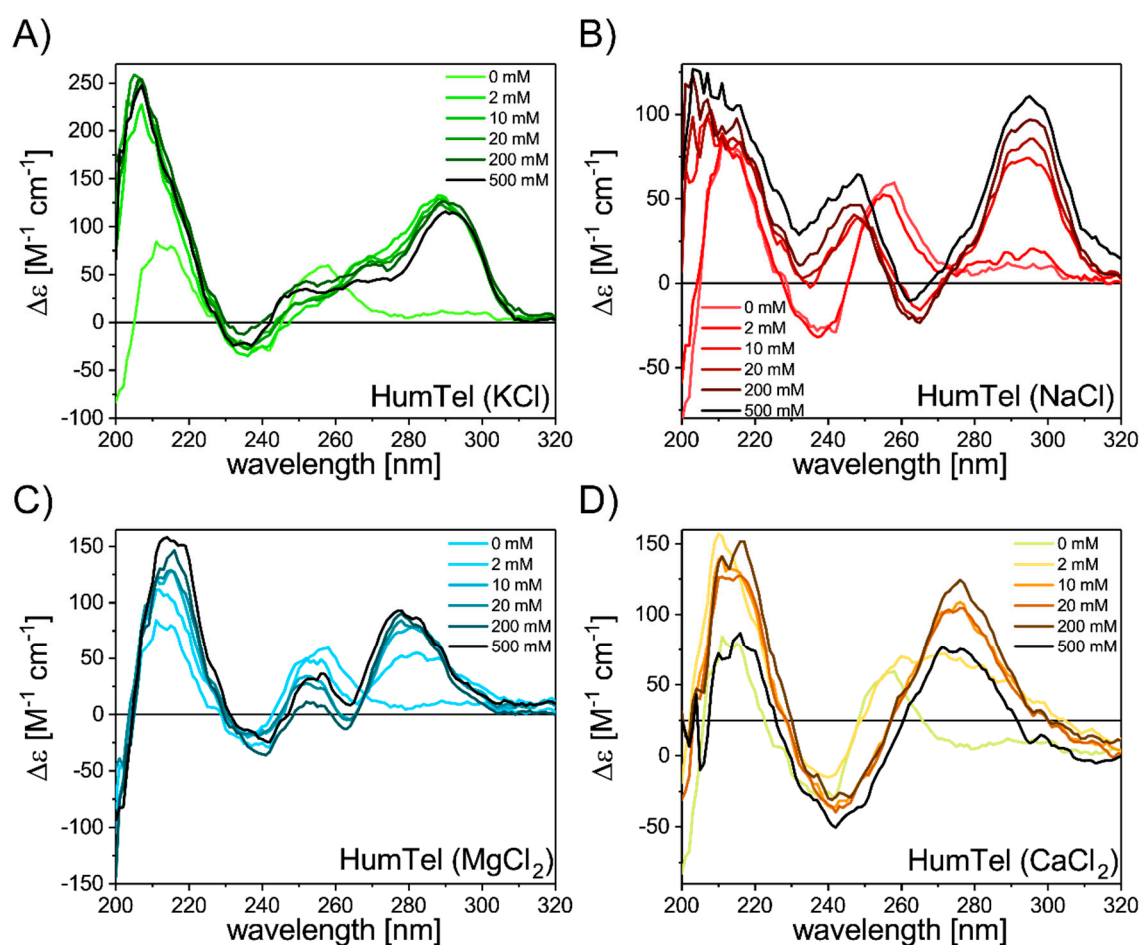

**Figure S1.** CD spectra of HumTel in presence of different salts (KCl (A), NaCl (B), MgCl<sub>2</sub> (C) and CaCl<sub>2</sub> (D)). The salt concentration ranges from 0 mM (light color) to 500 mM (dark color). The CD spectrum is influenced in presence of different salt meaning that the G-quadruplex structure changes in presence of different cations.

### Influence of the buffer

The TAE buffer has no influence on the CD spectrum when compared to the free telomeric DNA diluted in ultra-pure water (see Figure S2).

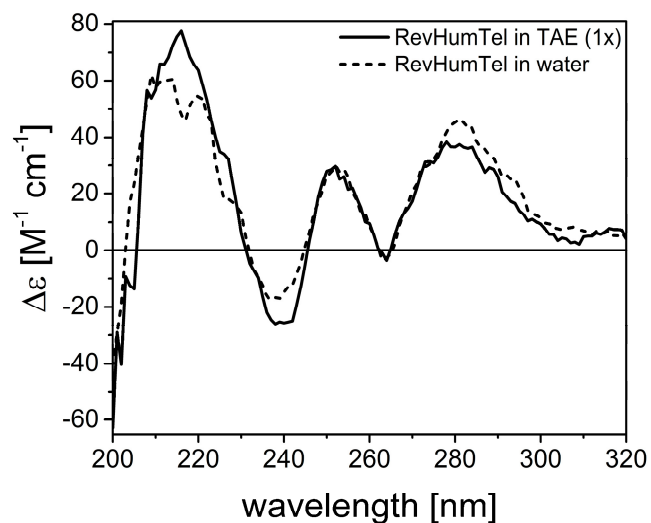

**Figure S2.** CD spectra of RevHumTel in TAE buffer (solid) and ultra-pure water (dashed). The CD spectrum is not influenced by the buffer.

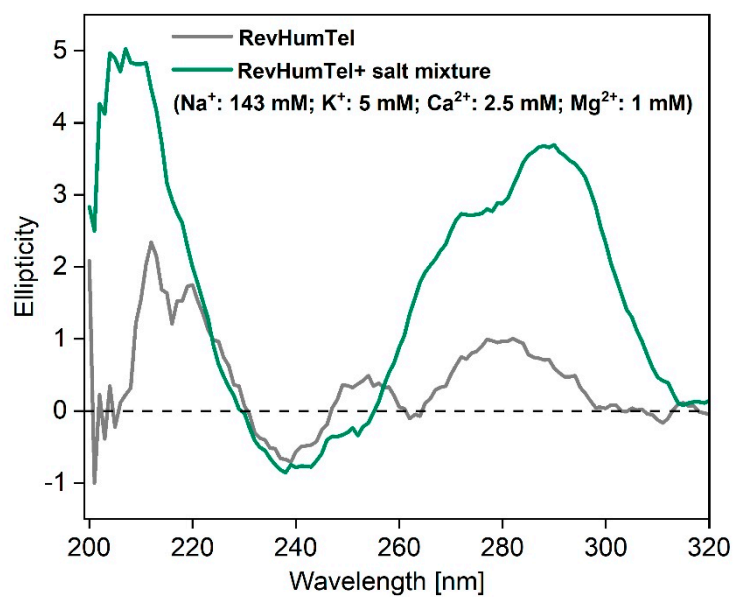

**Figure S3.** CD spectra of RevHumTel ( $c = 8.6 \mu M$ ) only and in presence of mixture of salts showing the dominance of hybrid-type G-quadruplex structure.

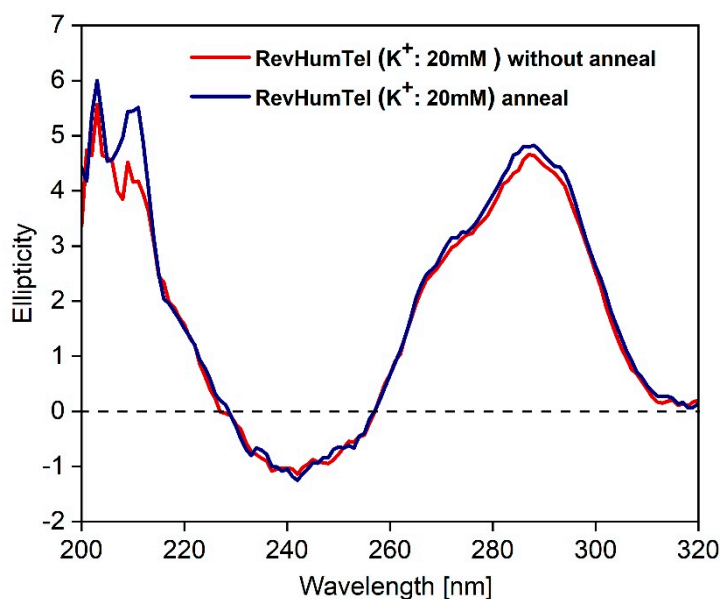

**Figure S4.** CD spectra of RevHumTel ( $c = 8.6 \mu\text{M}$ ) in presence of KCl (20mM) recorded after incubation for 15 min at RT (red curve) and after annealing for 15 min at 40 °C (blue).

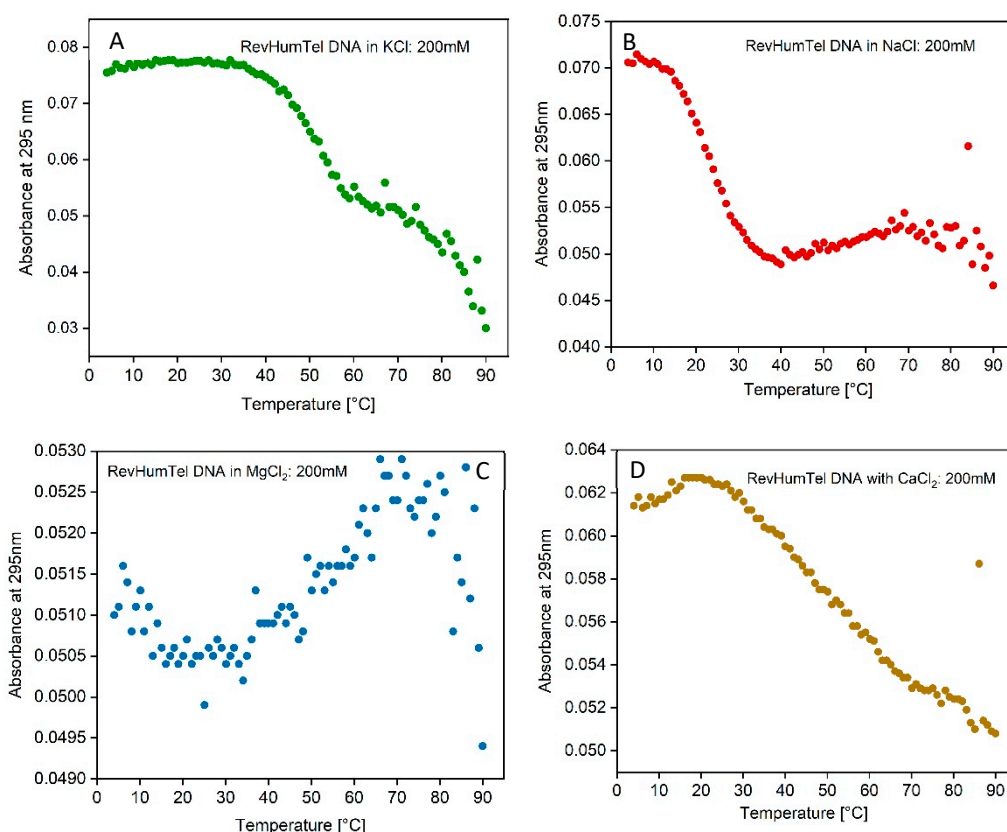

**Figure S5.** UV-thermal melting curves of RevHumTel in presence of different salts (A) KCl, (B) NaCl, (C) MgCl<sub>2</sub>, and (D) CaCl<sub>2</sub>. For all salt mixture, a final concentration of 200 mM is maintained. A biphasic melting profile in case of RevHumTel-KCl and NaCl mixture is observed (with melting points at 50 °C and 80 °C for KCl, and 23 °C and 81 °C for NaCl). For MgCl<sub>2</sub> no clear melting behaviour could be observed, while CaCl<sub>2</sub> gives rise to a broad melting stage with a melting temperature of 45 °C, suggesting that multiple conformations are present with close melting temperatures.

### Spectral overlap of Fluorescein and Cy3

The software PhotochemCAD 2.1 has been used to calculate the spectral overlap integrals  $J$  and the Förster radius  $R_0$  for FAM and Cy3. The FAM emission and Cy3 absorption spectra (acceptor's absorption spectrum in terms of extinction coefficient) are imported and the dipole orientation factor ( $\kappa_2 = 2/3$ ), the refractive index ( $n = 1.33$ ) and the donor's quantum yield ( $\phi(\text{FAM}) = 0.90$ ) are used as inputs in the software. The determined spectral overlap integral is  $5.6 \cdot 10^{15} \text{ nm}^4 \cdot \text{l} \cdot \text{mol}^{-1}$  and the Förster radius for FAM/Cy3 is 6.7 nm. The donor's emission and acceptor absorption spectra are shown in Figure S6.

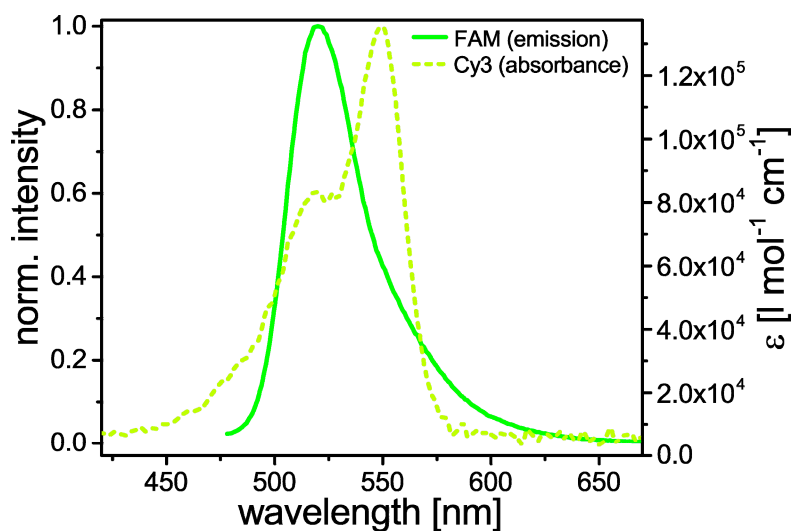

**Figure S6.** Spectral overlap of FAM emission (green) and Cy3 (yellow) absorption spectra.
